# Supplementary material for: Studies on the Effect of Oil and Surfactant on the Formation of Alginate-Based O/W Lidocaine Nanocarriers Using Nanoemulsion Template
Source: MDPI journal article supplement (doi:10.3390/pharmaceutics12121223), 2020-12-17
Supplement: s1 [file s1]

## Supplementary Materials: Studies on the effect of oil and surfactant on the formation of alginate-based o/w lidocaine nanocarriers using nanoemulsion template

Omar Sarheed\*, Manar Dibi and Kanteti V.R.N.S. Ramesh

Table S1. Experimental values obtained for  $d_{32}$  and  $d_{43}$

| Surfactant-to-oil ratio | Lipid type  | $d_{32}$ | $d_{43}$ |
|-------------------------|-------------|----------|----------|
| 5:1                     | Beeswax     | 22.1 nm  | 37.6 nm  |
|                         | Coconut oil | 111.7 nm | 180.9 nm |
|                         | Oleic acid  | 13.2 nm  | 15.9 nm  |
| 7:1                     | Beeswax     | 12.0 nm  | 13.9 nm  |
|                         | Coconut oil | 12.1 nm  | 13.9 nm  |
|                         | Oleic acid  | 13.5 nm  | 16.1 nm  |
| 10:1                    | Beeswax     | 13.2 nm  | 16.3 nm  |
|                         | Coconut oil | 12.3 nm  | 14.6 nm  |
|                         | Oleic acid  | 15.0 nm  | 17.7 nm  |
| 5:2                     | Beeswax     | 13.3 nm  | 16.4 nm  |
|                         | Coconut oil | 12.6 nm  | 15.3 nm  |
|                         | Oleic acid  | 303.6 nm | 350.5 nm |
| 7:2                     | Beeswax     | 14.2 nm  | 18.9 nm  |
|                         | Coconut oil | 10.9 nm  | 12.8 nm  |
|                         | Oleic acid  | 17.8 nm  | 23.3 nm  |
| 10:2                    | Beeswax     | 14.4 nm  | 18.4 nm  |
|                         | Coconut oil | 11.7 nm  | 13.6 nm  |
|                         | Oleic acid  | 13.2 nm  | 15.6 nm  |

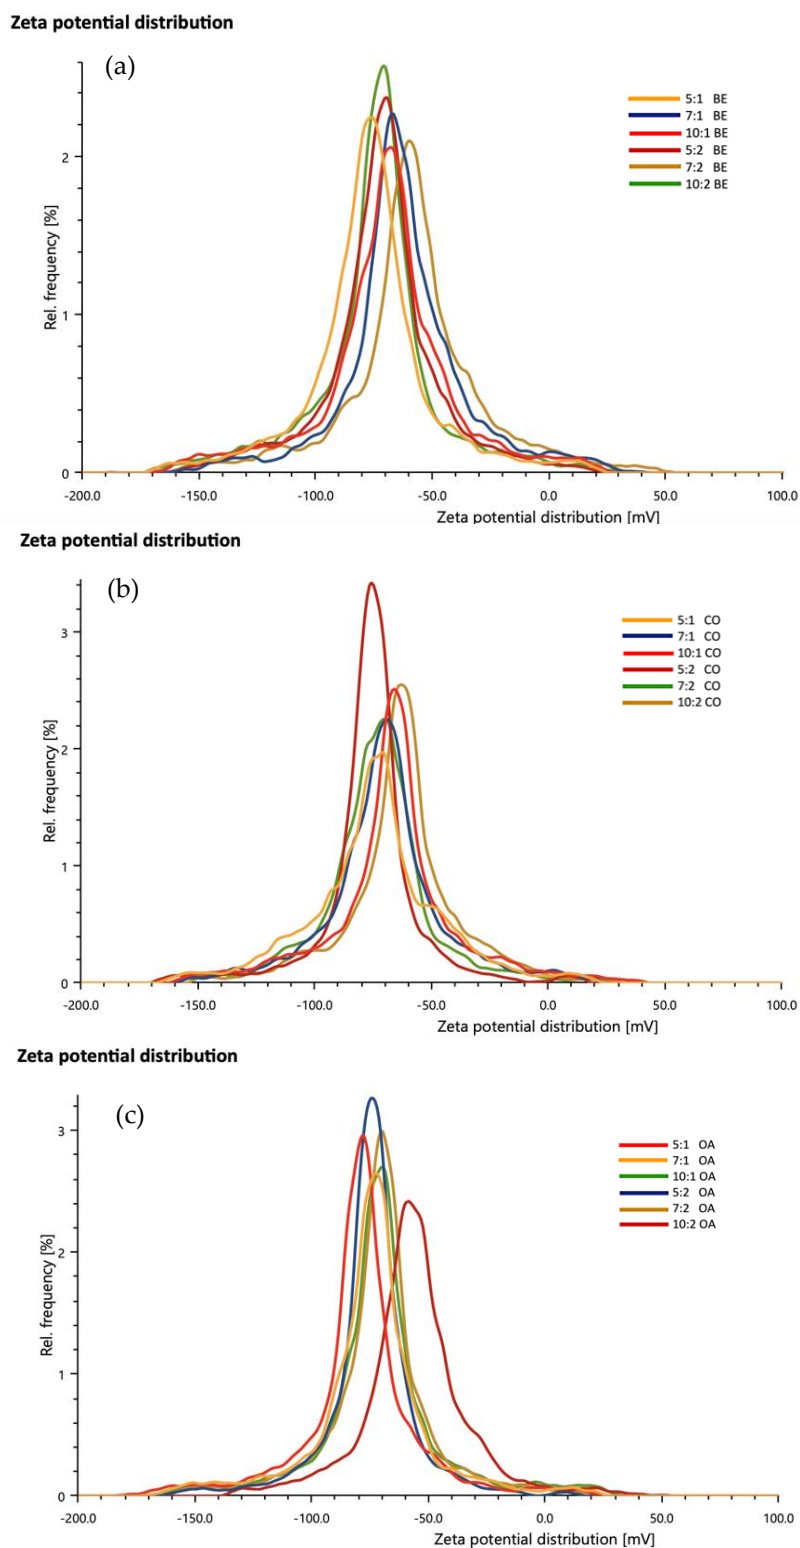

**Figure S1.** Zeta potential of lidocaine-loaded nanoemulsions formulated with (a) beeswax, (b) coconut oil and (c) oleic acid formulations.
